# Supplementary material for: Risk and Prognostic Factors in Very Old Patients with Sepsis Secondary to Community-Acquired pneumonia
Source: Preprints.org preprint supplement (doi:10.20944/preprints201906.0183.v1), 2019-06-19
Supplement: Supplementary file 2 [file supplementary]

Archive with 4 entries (3 files):
- supplementary-revision/
- supplementary-revision/Supplementary Data-revision.pdf
- supplementary-revision/Supplementary Figure 1.tif
- supplementary-revision/Supplementary Figure 2.tif
