# Supplementary figures and images for: Risk and Prognostic Factors in Very Old Patients with Sepsis Secondary to Community-Acquired pneumonia
Source: Preprints.org preprint supplement (doi:10.20944/preprints201906.0183.v1), 2019-06-19

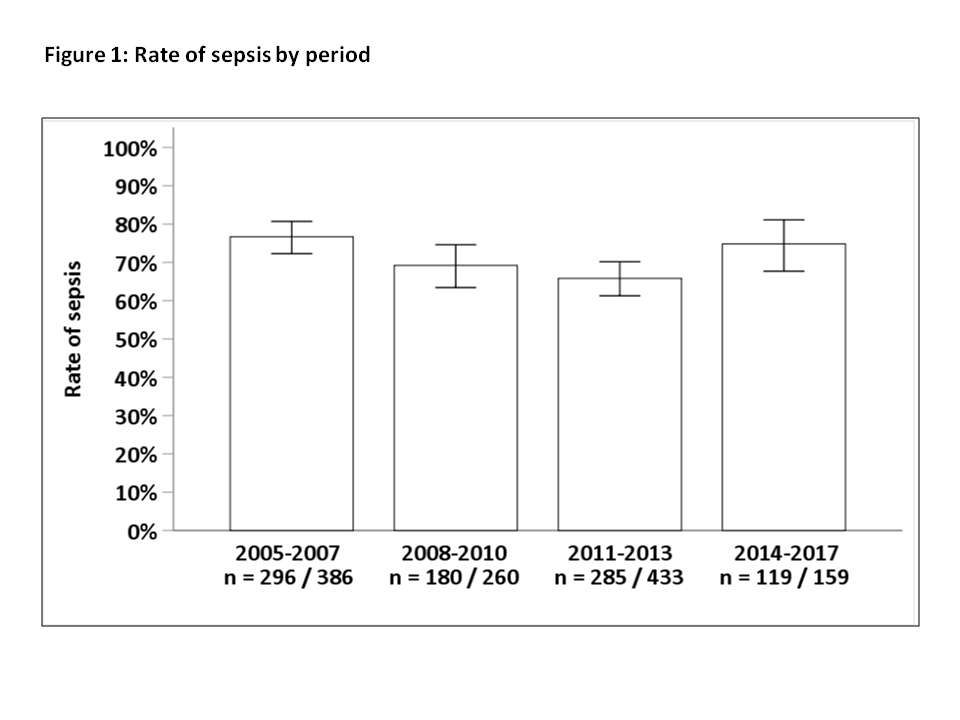

Supplement: Supplementary file 2 [file supplementary › supplementary-revision/Supplementary Figure 1.tif]

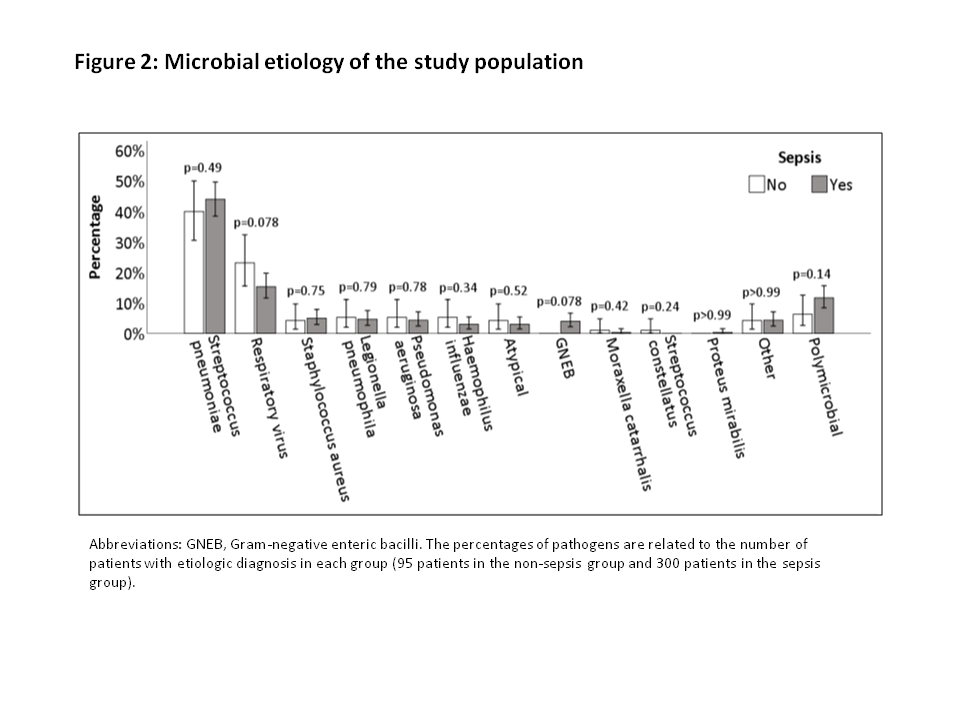

Supplement: Supplementary file 2 [file supplementary › supplementary-revision/Supplementary Figure 2.tif]
